# Supplementary material for: Stress indicator gene expression profiles, colony dynamics and tissue development of honey bees exposed to sub-lethal doses of imidacloprid in laboratory and field experiments
Source: PLOS journal article supplement (doi:10.1371/journal.pone.0171529), 2017-02-09
Supplement: S1 (10.1371/journal.pone.0171529.s001) [file journal.pone.0171529.s001]

A

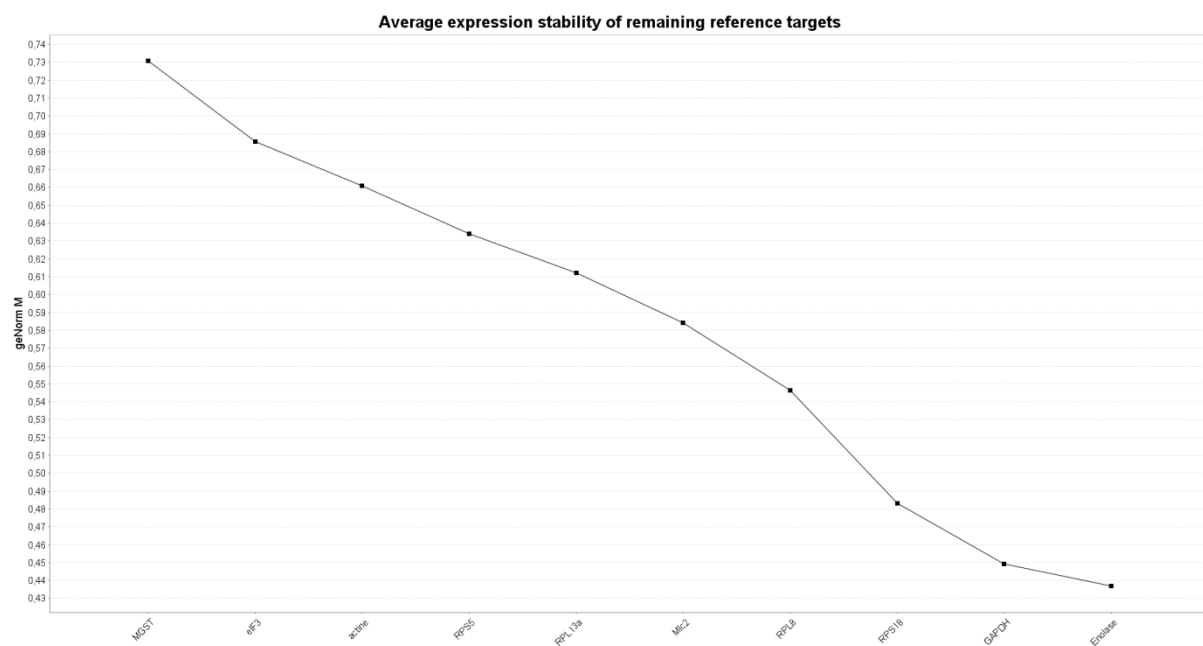

B

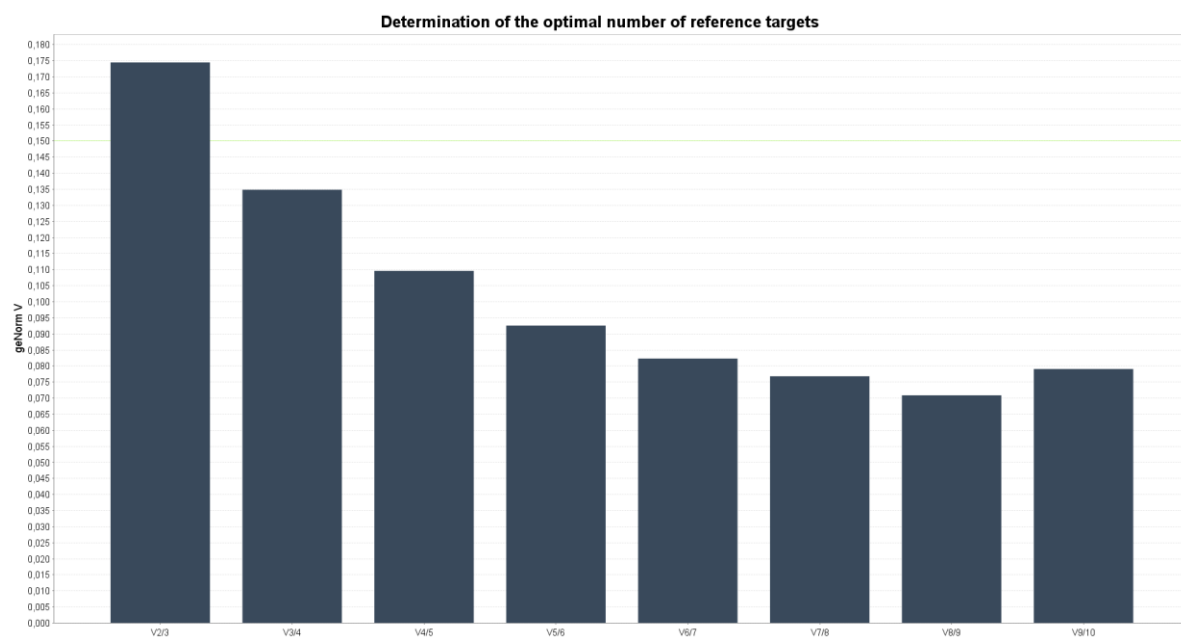

Figure S1 A: Average expression stability of remaining reference targets. B: Determination of the optimal number of reference targets.
